# Supplementary material
Source: PubMed Central journal article supplement (PMC4095935)
Supplement: ct500090q_si_001.pdf [file ct500090q_si_001.pdf]

## Supporting Information

for “Improved Reweighting of Accelerated Molecular Dynamics Simulations for Free Energy Calculation” by Yinglong Miao, William Sinko, Levi Pierce, Denis Bucher, Ross C. Walker and J. Andrew McCammon

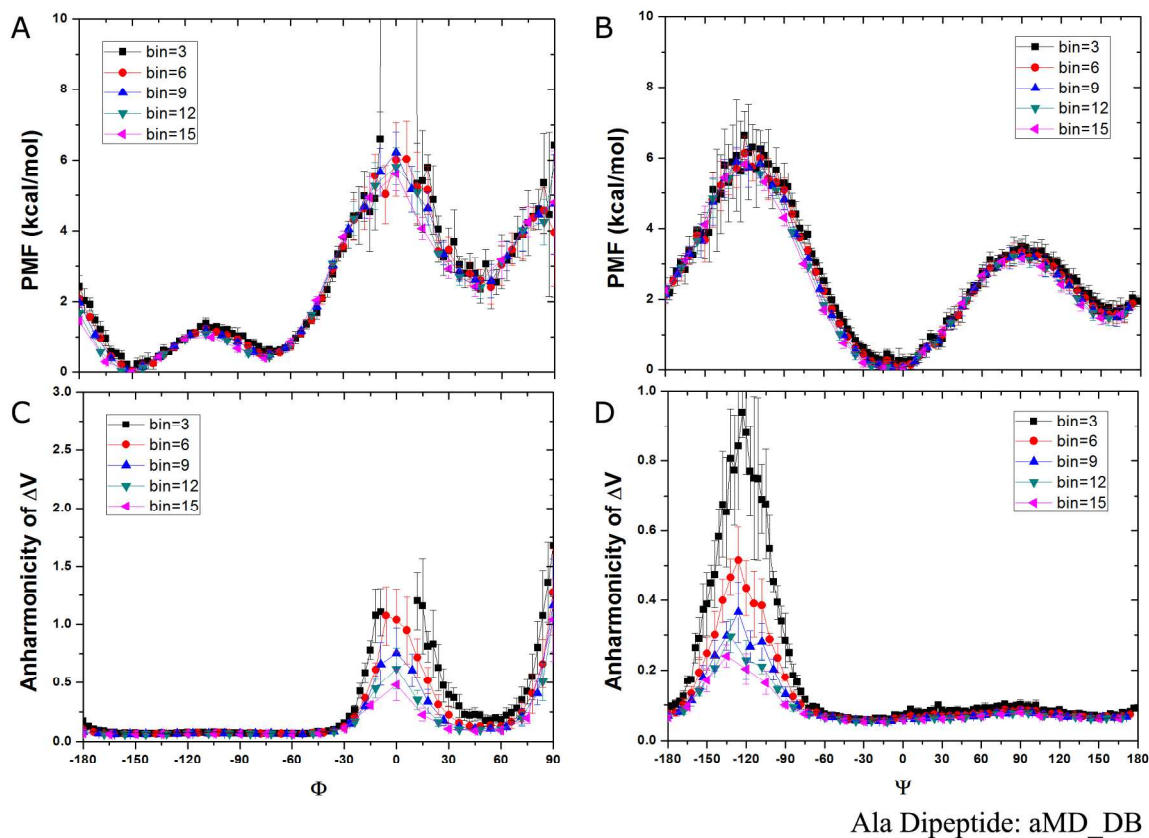

**Fig. S1** Free energy profiles of backbone dihedrals (A)  $\Phi$  and (B)  $\Psi$  in alanine dipeptide calculated by reweighting five independent 20 ns dual-boost aMD simulations using cumulant expansion to the 2<sup>nd</sup> order, and the corresponding anharmonicity of boost potential in (C) and (D), respectively.

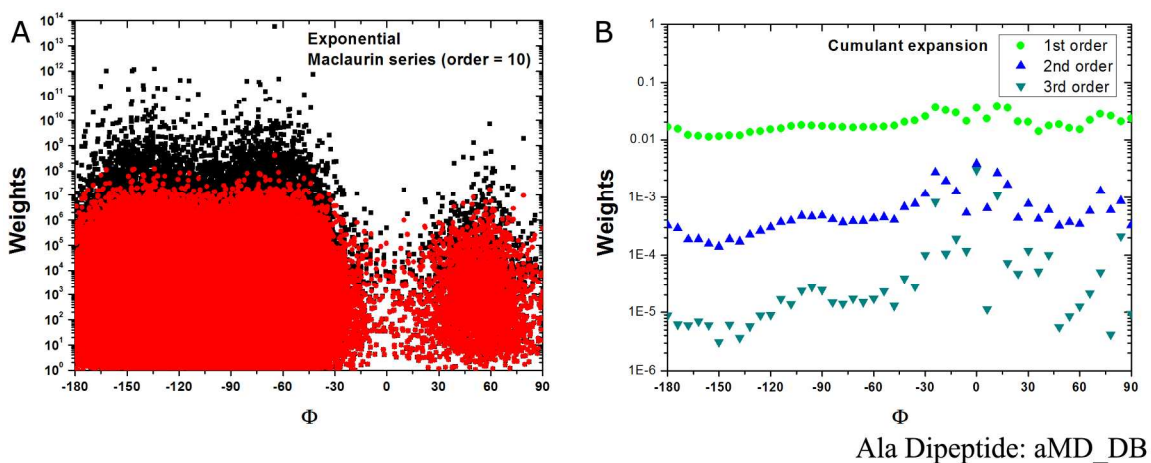

**Fig. S2** The reweighting factors of backbone dihedral  $\Phi$  in alanine dipeptide calculated from a representative 20 ns dual-boost aMD simulation: (A) the exponentials and Maclaurin series expansion to the 10<sup>th</sup> order, and (B) cumulant expansion to the 1<sup>st</sup>, 2<sup>nd</sup> and 3<sup>rd</sup> order, respectively.

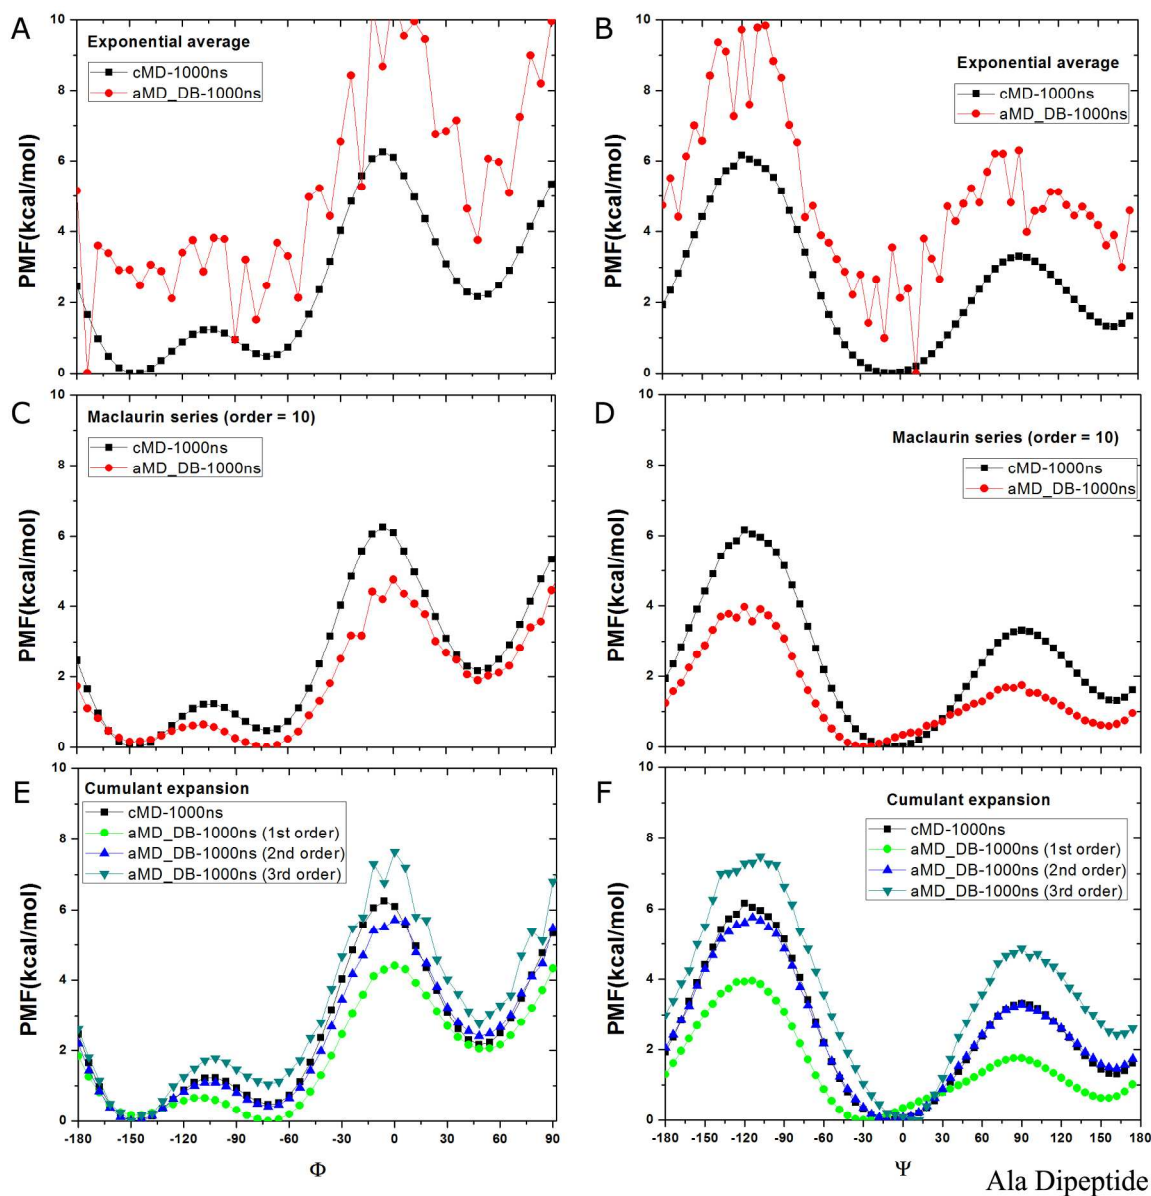

**Fig. S3** Free energy profiles of backbone dihedrals  $\Phi$  and  $\Psi$  in alanine dipeptide calculated by reweighting a 1000 ns dual-boost aMD simulations using: (A-B) exponential average, (C-D) Maclaurin series expansion to the 10<sup>th</sup> order, (E-F) cumulant expansion to the 1<sup>st</sup>, 2<sup>nd</sup> and 3<sup>rd</sup> orders. The free energy profiles obtained from a 1000 ns cMD simulation are plotted in black for comparison. The PMF profiles are closely similar to those obtained from the 20 ns dual-boost aMD simulations as shown in **Fig. 3**.

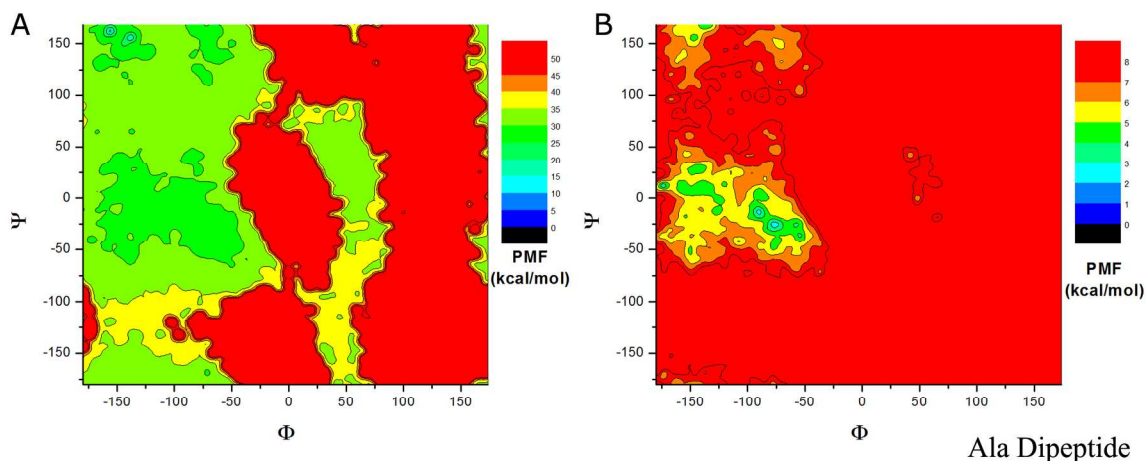

**Fig. S4** Two-dimensional free energy profiles of backbone dihedrals ( $\Phi$ ,  $\Psi$ ) in alanine dipeptide calculated from reweighting of (A) 20 *ns* and (B) 1000 *ns* dual-boost aMD simulation using exponential average. Overall, the exponential average reweighting produces highly fluctuating PMF, notably with large magnitudes of 20-40 kcal/mol in the 20 *ns* aMD simulation.

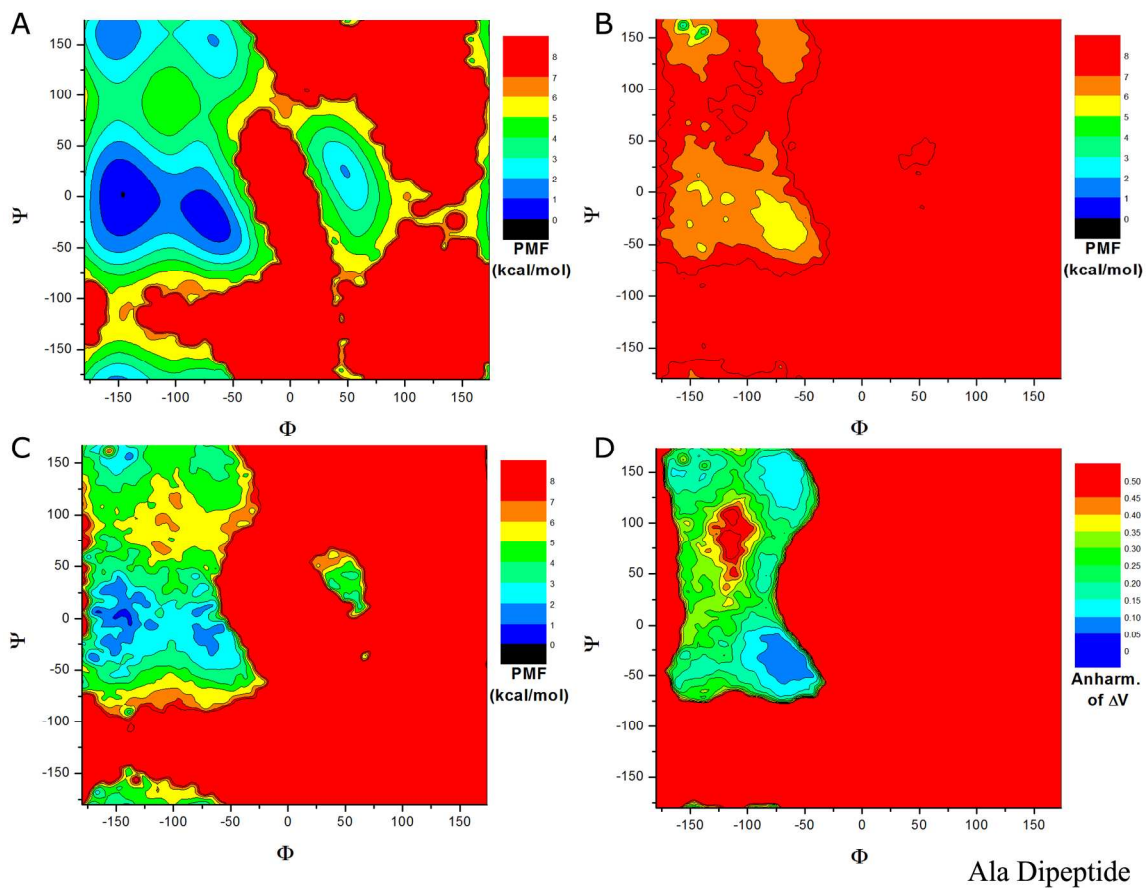

**Fig. S5** Two-dimensional free energy profiles of backbone dihedrals ( $\Phi$ ,  $\Psi$ ) in alanine dipeptide calculated from (A) 1000 *ns* cMD simulation and reweighting of a 20 *ns* dual-boost aMD simulation using (B) Maclaurin series to the 10<sup>th</sup> order and (C) cumulant

expansion to the 2<sup>nd</sup> order. (D) The distribution anharmonicity of  $\Delta V$  of frames found in each bin of  $(\Phi, \Psi)$  in the 1000 ns dual-boost aMD simulation. The 20 ns dual-boost aMD simulation appears to lack converged sampling compared with the 1000 ns simulation as shown in Fig. 5.

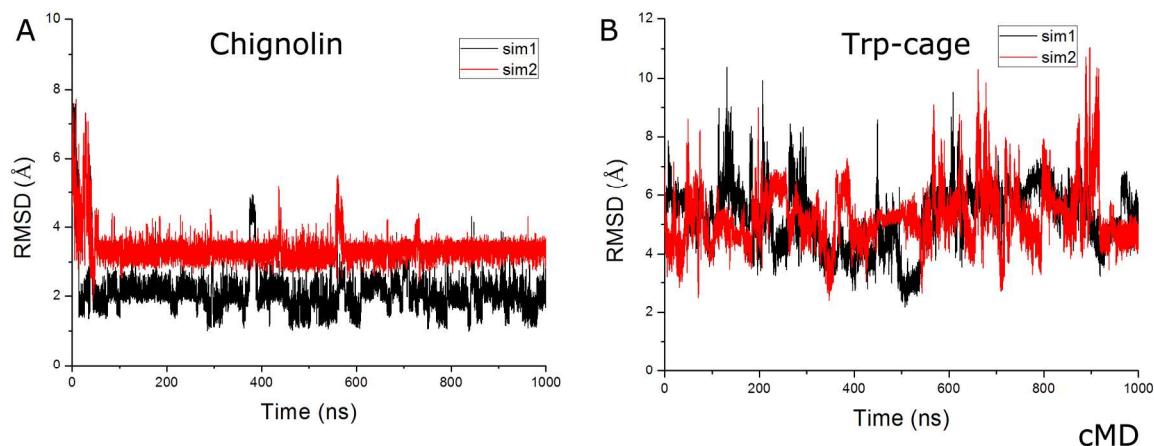

**Fig. S6** The root-mean-square deviation (RMSD) of the protein  $C_\alpha$  atoms relative to the experimentally-determined folded structure calculated from 1000 ns cMD simulations: (A) Chignolin and (B) Trp-cage.

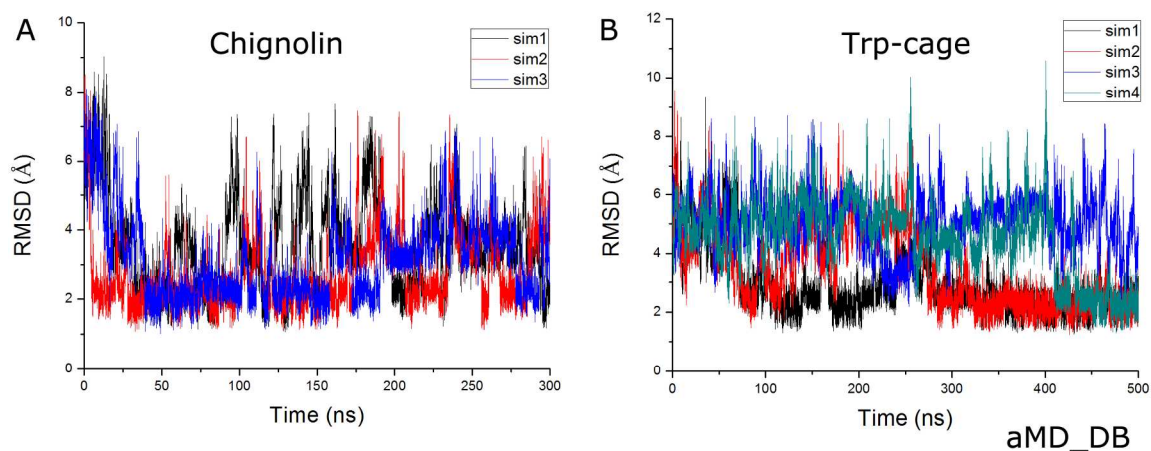

**Fig. S7** The root-mean-square deviation (RMSD) of the protein  $C_\alpha$  atoms relative to the experimentally-determined folded structure calculated from dual-boost aMD simulations: (A) Chignolin and (B) Trp-cage.
